# Supplementary material
Source: Springer Nature journal article supplement (https://www.springermedizin.de/resource/supplementary/12879_2011_1685_MOESM1_ESM.pdf/9443068)

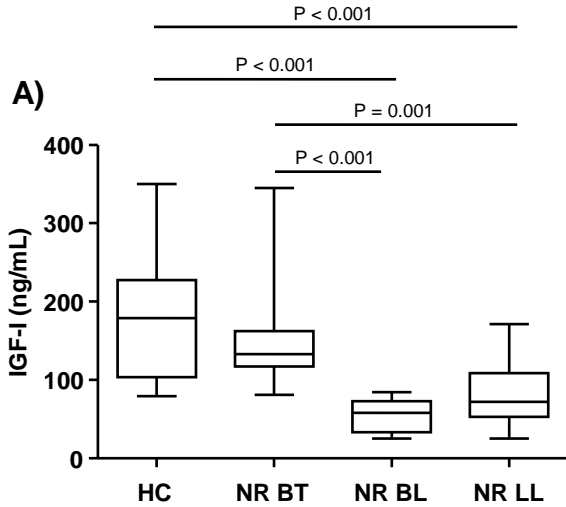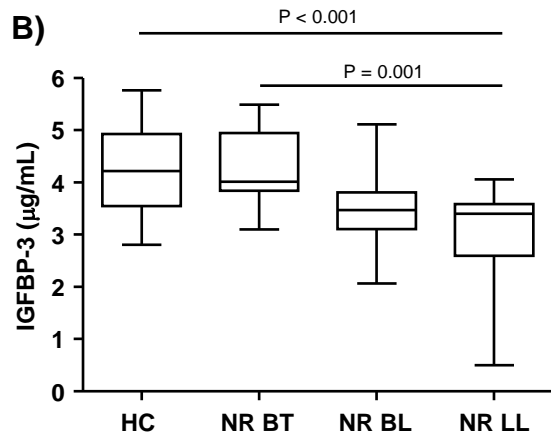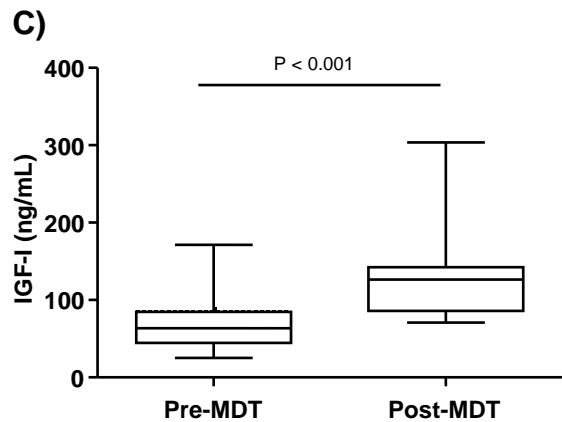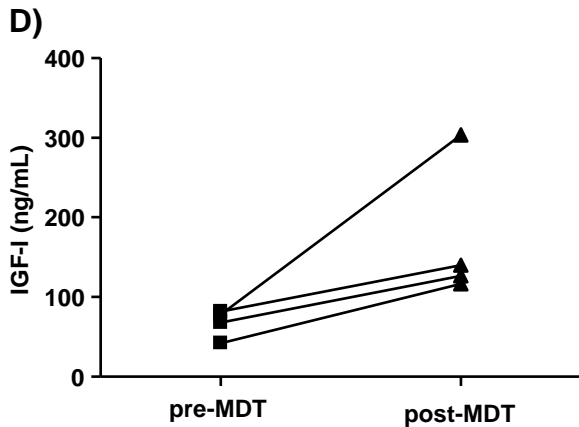

Supplement: MOESM1 [file 9443068]
